# Supplementary material for: Toxic Levels of Some Heavy Metals in Drinking Network Surface Water of Damietta Governorate, Egypt
Source: Copernicus journal article supplement (doi:10.5194/dwes-2016-2), 2016-03-21
Supplement: Supplementary file [file dwes-2016-2-AC3-supplement.pdf]

1 **Toxic Levels of Some Heavy Metals in Drinking Network Surface Water of**  
2 **Damietta Governorate, Egypt**

3  
4 **Mohamed.S.M. EL-Bady**  
5 **Department of Geological Sciences**  
6 **National Research Center, Dokki, Cairo, Egypt**  
7 **E-Mails: elbady\_nrc@yahoo.com - m.elbady71@yahoo.com**  
8 **dr.elbady.nrc@gmail.com**  
9

10 **ABSTRACT:**

11 In this paper, the heavy metals of the surface drinking water of Damietta  
12 governorate were evaluated. Damietta district, Farascore City, EL-Zarka City and Kafr  
13 Saad City are the main locations of drinking water pollution. The villages of the Damietta  
14 governorate have concentration values less than the permissible limits of World Health  
15 Organization (WHO) and Egyptian Ministry Health (EMH). The pollution in the villages  
16 water by heavy metals less than that in the cities.

17  
18 **Keywords:** Water – pollution – Drinking – Damietta - Toxic  
19

20 **INTRUDUTION:**

21  
22 Environmental problems such as water and air pollution have been occurred due  
23 to the agricultural and industrial development, where this pollution affect on the human  
24 health (Wang et al. 2010;Patrick 2003). The heavy metals entering the biosphere due to  
25 the industrialization and urbanization projects (Nweke 2009;Gazso 2001). About 80% of  
26 the illness is accompanied with water pollution in developing countries, where more than  
27 14,000 death cases daily (Pink and Daniel 2006; West 2006).

28 Uses of water for drinking, agriculture and industry purposes impair due to  
29 anthropogenic and natural processes that degrade the water (Sanchez et al. 2007).  
30 Chronic diseases (Liver Cirrhosis, Rental Failure, Chronic Anemia and Hair Loss) occur  
31 due to the pollution of drinking water by heavy metals such as Cu, Cd, Ni, Cr and Pb  
32 (Wang et al, 2010, Salem et al., 2000). Renal failure is occur when the drinking water  
33 polluted with Cd and Pb; liver cirrhosis to the pollution with Cu and molybdenum; hair  
34 loss to the pollution with Cr and Ni; and chronic anemia to the pollution with Cd and Cu  
35 (Johri et al., 2010).

36 Most of Damietta governorate lands with agricultural activities. Where, use the  
37 pesticides and fertilizers increase the pollution in water and plants. Thus the human  
38 health in dangerous in Damietta Governorate especially after the construction of the  
39 industrial area, Damietta Harbor, reclamation projects and agricultural development.

40 The drinking water resources in the Damietta governorate comprise both Damietta  
41 Nile branch surface and ground waters. Water pollution is the main environmental  
42 problem in Damietta Governorate and in whole Arab Republic of Egypt. Pollution  
43 sources of Damietta Nile Branches water come from agricultural drains, domestic  
44 sewage, industrial effluents and fish farms (Abdel Wahaab and Badawy 2004).  
45  
46  
47

48  
49  
50  
51  
52  
53  
54  
55  
56  
57  
58  
59  
60  
61

## SAMPLING AND METHODS:

Drinking water samples were collected from different districts of Damietta governorate; Damietta, New Damietta City, Ras El-Bar, Kfr Saad, Farascour and EL-Zarka (Fig. 1). These samples collected from surface network water in each district, where the samples taken from public site in district. The samples randomly collected from each site in district. Heavy metals concentrations of drinking surface network water were analyzed by atomic absorption spectrophotometer (AAS) (Table 1). These metals are lead (Pb), zinc (Zn), copper (Cu), cobalt (Co), cadmium (Cd), nickel (Ni), chromium (Cr), iron (Fe) and manganese (Mn). The estimated values compared with WHO, 2011 and EMH, 2007 values to evaluate the studied drinking water. Where, this instrument available in the National Research Center for such studies.

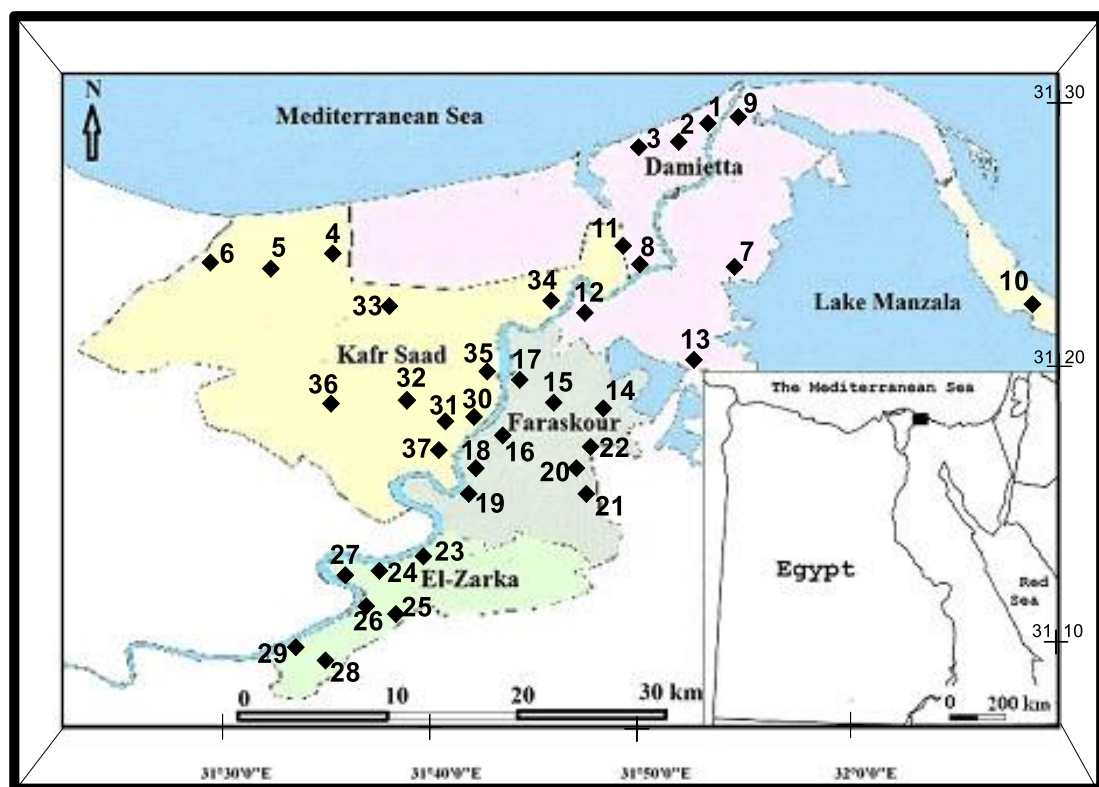

Fig. (1): Location map for the different surface drinking water samples.

62  
63  
64  
65  
66  
67  
68  
69  
70  
71  
72

## Calculation of Pollution Index:

The pollution index (PI) was used in this study to evaluate the degree of heavy metal contamination in water samples (Chon, et al., 1991; Kim et al., 1998; Emoyan et al., 2005; Odukoya and Abimbola 2010). The tolerable level is the element concentration in the water considered safe for human consumption (Lee et al., 1998). Pollution index

73 (PI) is based on individual metal calculations and categorized into 6 classes (Table 2)  
 74 according the following equation (Caerio et al., 2005).

$$PI = \sum_{i=1}^n \frac{\left(\frac{C_i}{S_i}\right)}{Nm}$$

75  
 76 Where  $C_i$  = Heavy metal concentration in water;  $S_i$ = permissible Level and  $N_m$  = Number  
 77 of Heavy metals.

78 Water sample with Pollution Index (PI) greater than 1 is regarded as being contaminated

79 **Table (1): Values of some heavy metals analyses in ppm (mg/L) of drinking surface**  
 80 **network water in Damietta governorate, northern Egypt.**

| No.                                  | District/sample name                   | Cd           | Cu          | Co           | Ni           | Cr           | Pb           | Mn          | Fe          | Zn          |
|--------------------------------------|----------------------------------------|--------------|-------------|--------------|--------------|--------------|--------------|-------------|-------------|-------------|
|                                      | <b>Permissible limit of WHO (2011)</b> | <b>0.003</b> | <b>2.0</b>  | <b>0.05</b>  | <b>0.07</b>  | <b>0.05</b>  | <b>0.01</b>  | <b>0.4</b>  | <b>0.3</b>  | <b>3.0</b>  |
|                                      | <b>Permissible limit of EMH (2007)</b> | <b>0.003</b> | <b>2.0</b>  | <b>0.05</b>  | <b>0.02</b>  | <b>0.05</b>  | <b>0.01</b>  | <b>0.4</b>  | <b>0.3</b>  | <b>3.0</b>  |
| <b>Ras ELBar District Network</b>    |                                        |              |             |              |              |              |              |             |             |             |
| 1                                    | <b>East of Ras ELBar</b>               | <b>0.003</b> | <b>0.01</b> | <b>0.003</b> | <b>0.008</b> | <b>0.001</b> | <b>0.003</b> | <b>0.0</b>  | <b>0.02</b> | <b>0.0</b>  |
| 2                                    | <b>Center of Ras ELBar</b>             | <b>0.003</b> | <b>0.01</b> | <b>0.002</b> | <b>0.009</b> | <b>0.002</b> | <b>0.003</b> | <b>0.01</b> | <b>0.02</b> | <b>0.01</b> |
| 3                                    | <b>West of Ras ELBar</b>               | <b>0.003</b> | <b>0.01</b> | <b>0.002</b> | <b>0.009</b> | <b>0.003</b> | <b>0.003</b> | <b>0.00</b> | <b>0.03</b> | <b>0.00</b> |
| <b>New Damietta District Network</b> |                                        |              |             |              |              |              |              |             |             |             |
| 4                                    | <b>East of New Damietta City</b>       | <b>0.003</b> | <b>0.05</b> | <b>0.002</b> | <b>0.007</b> | <b>0.006</b> | <b>0.003</b> | <b>0.01</b> | <b>0.03</b> | <b>0.01</b> |
| 5                                    | <b>Center of New Damietta City</b>     | <b>0.003</b> | <b>0.01</b> | <b>0.002</b> | <b>0.009</b> | <b>0.007</b> | <b>0.004</b> | <b>0.00</b> | <b>0.03</b> | <b>0.00</b> |
| 6                                    | <b>West of New Damietta City</b>       | <b>0.003</b> | <b>0.01</b> | <b>0.002</b> | <b>0.008</b> | <b>0.005</b> | <b>0.003</b> | <b>0.01</b> | <b>0.03</b> | <b>0.01</b> |
| <b>Damietta District Network</b>     |                                        |              |             |              |              |              |              |             |             |             |
| 7                                    | <b>East of Damietta City</b>           | <b>0.03</b>  | <b>0.05</b> | <b>0.002</b> | <b>0.08</b>  | <b>0.06</b>  | <b>0.03</b>  | <b>0.0</b>  | <b>0.0</b>  | <b>0.0</b>  |
| 8                                    | <b>West of Damietta City</b>           | <b>0.04</b>  | <b>1.01</b> | <b>0.001</b> | <b>0.09</b>  | <b>0.07</b>  | <b>0.04</b>  | <b>0.02</b> | <b>0.02</b> | <b>0.01</b> |
| 9                                    | <b>EzbitELBurg</b>                     | <b>0.04</b>  | <b>2.01</b> | <b>0.003</b> | <b>0.08</b>  | <b>0.05</b>  | <b>0.03</b>  | <b>0.0</b>  | <b>0.02</b> | <b>0.01</b> |
| 10                                   | <b>Shata</b>                           | <b>0.03</b>  | <b>0.05</b> | <b>0.002</b> | <b>0.08</b>  | <b>0.06</b>  | <b>0.03</b>  | <b>0.0</b>  | <b>0.02</b> | <b>0.0</b>  |
| 11                                   | <b>ELSenanea</b>                       | <b>0.04</b>  | <b>1.01</b> | <b>0.001</b> | <b>0.09</b>  | <b>0.07</b>  | <b>0.04</b>  | <b>0.00</b> | <b>0.01</b> | <b>0.01</b> |
| 12                                   | <b>ELBostan</b>                        | <b>0.04</b>  | <b>2.01</b> | <b>0.001</b> | <b>0.08</b>  | <b>0.05</b>  | <b>0.03</b>  | <b>0.02</b> | <b>0.00</b> | <b>0.00</b> |
| 13                                   | <b>ELBasarta</b>                       | <b>0.03</b>  | <b>0.05</b> | <b>0.001</b> | <b>0.08</b>  | <b>0.06</b>  | <b>0.03</b>  | <b>0.01</b> | <b>0.00</b> | <b>0.01</b> |
| <b>Farascor District Network</b>     |                                        |              |             |              |              |              |              |             |             |             |
| 14                                   | <b>East of Farascor City</b>           | <b>0.03</b>  | <b>0.01</b> | <b>0.002</b> | <b>0.07</b>  | <b>0.02</b>  | <b>0.011</b> | <b>0.01</b> | <b>0.01</b> | <b>0.01</b> |
| 15                                   | <b>Center of Farascor City</b>         | <b>0.03</b>  | <b>0.02</b> | <b>0.003</b> | <b>0.09</b>  | <b>0.04</b>  | <b>0.022</b> | <b>0.0</b>  | <b>0.01</b> | <b>0.01</b> |
| 16                                   | <b>West of Farascor City</b>           | <b>0.02</b>  | <b>0.01</b> | <b>0.003</b> | <b>0.08</b>  | <b>0.03</b>  | <b>0.011</b> | <b>0.0</b>  | <b>0.01</b> | <b>0.0</b>  |
| 17                                   | <b>ELHorany</b>                        | <b>0.003</b> | <b>0.01</b> | <b>0.003</b> | <b>0.009</b> | <b>0.002</b> | <b>0.022</b> | <b>0.0</b>  | <b>0.0</b>  | <b>0.01</b> |
| 18                                   | <b>KafrELArab</b>                      | <b>0.003</b> | <b>0.01</b> | <b>0.002</b> | <b>0.008</b> | <b>0.003</b> | <b>0.023</b> | <b>0.01</b> | <b>0.01</b> | <b>0.01</b> |
| 19                                   | <b>ELBarashea</b>                      | <b>0.002</b> | <b>0.0</b>  | <b>0.002</b> | <b>0.007</b> | <b>0.003</b> | <b>0.022</b> | <b>0.01</b> | <b>0.00</b> | <b>0.01</b> |
| 20                                   | <b>ELRoda</b>                          | <b>0.003</b> | <b>0.01</b> | <b>0.002</b> | <b>0.006</b> | <b>0.003</b> | <b>0.021</b> | <b>0.01</b> | <b>0.01</b> | <b>0.00</b> |

|    |               |       |      |       |       |       |       |       |      |      |
|----|---------------|-------|------|-------|-------|-------|-------|-------|------|------|
| 21 | TafteshELSerw | 0.003 | 0.0  | 0.002 | 0.006 | 0.002 | 0.011 | 0.001 | 0.01 | 0.0  |
| 22 | ELAtawy       | 0.002 | 0.01 | 0.001 | 0.007 | 0.001 | 0.023 | 0.00  | 0.00 | 0.01 |

81  
82  
83  
84  
85  
86  
87  
88  
89

**Continued: Table (1): Values of some heavy metals analyses in ppm (mg/L) of drinking surface network water in Damietta governorate, northern Egypt.**

| No.                              | District/sample name            | Cd    | Cu   | Co    | Ni    | Cr    | Pb    | Mn   | Fe   | Zn    |
|----------------------------------|---------------------------------|-------|------|-------|-------|-------|-------|------|------|-------|
|                                  | Permissible limit of WHO (2011) | 0.003 | 2.0  | 0.05  | 0.07  | 0.05  | 0.01  | 0.4  | 0.3  | 3.0   |
|                                  | Permissible limit of EMH (2007) | 0.003 | 2.0  | 0.05  | 0.02  | 0.05  | 0.01  | 0.4  | 0.3  | 3.0   |
| <b>EL-Zarka District Network</b> |                                 |       |      |       |       |       |       |      |      |       |
| 23                               | Dakahla                         | 0.003 | 0.01 | 0.001 | 0.007 | 0.01  | 0.01  | 0.01 | 0.00 | 0.01  |
| 24                               | ELSerw                          | 0.003 | 0.01 | 0.002 | 0.08  | 0.01  | 0.01  | 0.5  | 0.01 | 0.01  |
| 25                               | East of ELZarka City            | 0.03  | 0.00 | 0.002 | 0.06  | 0.02  | 0.01  | 0.00 | 0.00 | 0.01  |
| 26                               | Center of ELZarka City          | 0.03  | 0.01 | 0.002 | 0.07  | 0.003 | 0.01  | 0.01 | 0.00 | 0.00  |
| 27                               | West of ELZarka City            | 0.03  | 0.01 | 0.001 | 0.007 | 0.002 | 0.01  | 0.01 | 0.00 | 0.01  |
| 28                               | EzbitFarag                      | 0.001 | 0.0  | 0.001 | 0.005 | 0.0   | 0.0   | 0.0  | 0.0  | 0.002 |
| 29                               | Sheremsah                       | 0.003 | 0.01 | 0.001 | 0.006 | 0.01[ | 0.0   | 0.0  | 0.0  | 0.001 |
| <b>Kafr-Sad District Network</b> |                                 |       |      |       |       |       |       |      |      |       |
| 30                               | East of Kafr Sad City           | 0.01  | 0.0  | 0.001 | 0.08  | 0.06  | 0.02  | 0.0  | 0.0  | 0.0   |
| 31                               | Center of Kafr Sad City         | 0.02  | 0.01 | 0.001 | 0.04  | 0.07  | 0.02  | 0.01 | 0.0  | 0.0   |
| 32                               | West of Kafr Sad City           | 0.001 | 0.01 | 0.002 | 0.07  | 0.006 | 0.003 | 0.02 | 0.02 | 0.01  |
| 33                               | Om ELReda                       | 0.002 | 0.00 | 0.002 | 0.008 | 0.002 | 0.002 | 0.01 | 0.00 | 0.01  |
| 34                               | KafrELBatekh                    | 0.003 | 0.01 | 0.003 | 0.009 | 0.001 | 0.002 | 0.0  | 0.00 | 0.01  |
| 35                               | KafrEsleman                     | 0.001 | 0.01 | 0.002 | 0.007 | 0.002 | 0.001 | 0.01 | 0.02 | 0.01  |
| 36                               | ELMohamadea                     | 0.001 | 0.00 | 0.001 | 0.008 | 0.001 | 0.002 | 0.01 | 0.02 | 0.00  |
| 37                               | Mit Abu Ghaleb                  | 0.003 | 0.01 | 0.002 | 0.006 | 0.002 | 0.001 | 0.0  | 0.00 | 0.00  |

90  
91  
92  
93  
94

**Table. (2): Categories of Water Pollution Index.**

| Class | PI value | Class               |
|-------|----------|---------------------|
| 1     | <1       | No effect           |
| 2     | 1–2      | Slightly affected   |
| 3     | 2–3      | Moderately affected |
| 4     | 3–5      | Strongly affected   |

|   |    |                    |
|---|----|--------------------|
| 5 | >5 | Seriously affected |
|---|----|--------------------|

## RESULTS AND DISCUSSION

The results are shown in Table 1 and 3. Where, the concentration of heavy metals in the drinking water and the pollution index of each site recorded in these tables. The values in Table 1 were compared with the permissible limits of Egyptian Ministry Health (EMH) permissible limits, 2007 and the permissible limits of WHO, 2011. As well as the pollution index were determined for each site or sample.

The drinking surface network water in Ras EL-Bar and New Damietta cities is suitable for drinking due to the whole values of heavy metals less than the permissible limits of EMH, 2007 and WHO, 2011 (Table. 1). Pollution index (PI) of these districts or cities in Damietta governorate showed that the degree of heavy metals contamination is no effect (<1) (Table. 2 and 3).

In Damietta district, Cd values of the samples are more than the permissible limits of EMH, 2007 and WHO, 2011. Cu values of the samples less than the permissible limits of EMH, 2007 and WHO, 2011 except in samples 9 and 12. Ni, Cr, Pb values are  $\geq$  the permissible limits of EMH, 2007 and WHO, 2011. Co, Mn and Fe values are less than the permissible limits of EMH, 2007 and WHO, 2011. Pollution index of Damietta district is moderately affected category (2-3) (Table 2 and 3).

In Farascore district, the concentration values of heavy metals in Farascore city more than that in the villages of Farascore. Samples of Farascore city (14,15 and 16) showed that Cd, Ni, Cr and Pb values more than the permissible limits of EMH and WHO. The Cu, Co, Mn, Fe and Zn are less than the permissible limits of EMH and WHO. Samples of the villages of Farascore have values less than the permissible limits of EMH and WHO. Pollution index of the Farascore district showed slightly affected grad in samples 14, 15 and 16, while it is no affected grad in the other samples.

In EL-Zarka district, samples 25, 26 and 27 of Zarka city show that Cd Ni, Cr and Pb values more than the permissible limits of EMH, 2007 and WHO,2011. The Cu, Co, Mn, Fe and Zn are less than the permissible limits cof EMH and WHO. Samples of the villages of EL-Zarka have values less than the permissible limits of EMH and WHO. Pollution index of EL-Zarka district showed slightly affected grad in samples 25, 26 and 27, while it is no affected grad in the other samples.

In Kaf Saad district, the sample 30 and 31 of Kafr Saad city showed that Cd, Ni, Cr and Pb values more than the permissible limits of EMH, 2007 and WHO,2011, while the other metals are less than the permissible limits. Samples of the villages of Kafr Saad have concentration values less than the permissible limits of EMH, 2007 and WHO,2011. Pollution index of Kafr Saad district showed slightly affected grad in samples 30 and 31, while it is no affected grad in the other samples.

Thus the populations of Damietta City, Farascore City, EL-Zarka City and Kafr Saad City may be suffering from many diseases such as Liver Cirrhosis, Rental Failure, Chronic Anemia and Hair Loss.

## CONCLUSIONS

140 pollution of surface drinking water of Damietta governorate by heavy metals in  
 141 most of villages less than that in the cities of the Damietta governorate. Pollution index is  
 142 ranged between no affected to moderately affected for whole station samples.

143

144 **Table. (3): Pollution Index of drinking surface network water in Damietta**  
 145 **governorate, northern Egypt.**

146

| No.                                  | Cd    | Cu    | Co    | Ni    | Cr    | Pb    | Mn    | Fe    | Zn | PI    |
|--------------------------------------|-------|-------|-------|-------|-------|-------|-------|-------|----|-------|
| <b>Ras ELBar District Network</b>    |       |       |       |       |       |       |       |       |    |       |
| 1                                    | 0.111 | 0     | 0.006 | 0.044 | 0.002 | 0.033 | 0     | 0.007 | 0  | 0.205 |
| 2                                    | 0.111 | 0     | 0.004 | 0.05  | 0.004 | 0.033 | 0.002 | 0.007 | 0  | 0.214 |
| 3                                    | 0.111 | 0     | 0.004 | 0.05  | 0.006 | 0.033 | 0     | 0.011 | 0  | 0.217 |
| <b>New Damietta District Network</b> |       |       |       |       |       |       |       |       |    |       |
| 4                                    | 0.111 | 0     | 0.004 | 0.038 | 0.004 | 0.033 | 0.002 | 0.011 | 0  | 0.206 |
| 5                                    | 0.111 | 0     | 0.004 | 0.05  | 0.006 | 0.033 | 0     | 0.011 | 0  | 0.217 |
| 6                                    | 0.111 | 0     | 0.004 | 0.044 | 0.004 | 0.033 | 0.002 | 0.011 | 0  | 0.212 |
| <b>Damietta District Network</b>     |       |       |       |       |       |       |       |       |    |       |
| 7                                    | 1.11  | 0.002 | 0.004 | 0.44  | 0.133 | 0.333 | 0     | 0     | 0  | 2.02  |
| 8                                    | 1.48  | 0.056 | 0.002 | 0.5   | 0.155 | 0.444 | 0.005 | 0.007 | 0. | 2.65  |
| 9                                    | 1.48  | 0.111 | 0.006 | 0.444 | 0.111 | 0.333 | 0     | 0.007 | 0  | 2.49  |
| 10                                   | 1.11  | 0.002 | 0.004 | 0.444 | 0.133 | 0.333 | 0     | 0.007 | 0  | 2.03  |
| 11                                   | 1.48  | 0.056 | 0.002 | 0.5   | 0.155 | 0.444 | 0     | 0.003 | 0  | 2.64  |
| 12                                   | 1.48  | 0.111 | 0.002 | 0.444 | 0.111 | 0.333 | 0.005 | 0     | 0  | 2.48  |
| 13                                   | 1.11  | 0.002 | 0.002 | 0.444 | 0.133 | 0.333 | 0.002 | 0     | 0  | 2.03  |
| <b>Farascor District Network</b>     |       |       |       |       |       |       |       |       |    |       |
| 14                                   | 1.11  | 0     | 0.004 | 0.388 | 0.044 | 0.122 | 0.002 | 0.003 | 0  | 1.67  |
| 15                                   | 1.11  | 0.001 | 0.006 | 0.5   | 0.088 | 0.244 | 0     | 0.003 | 0  | 1.95  |
| 16                                   | 0.740 | 0     | 0.006 | 0.444 | 0.066 | 0.122 | 0     | 0.003 | 0  | 1.38  |
| 17                                   | 0.111 | 0     | 0.006 | 0.05  | 0.004 | 0.244 | 0     | 0     | 0  | 0.417 |
| 18                                   | 0.111 | 0     | 0.004 | 0.044 | 0.006 | 0.255 | 0.002 | 0.003 | 0  | 0.429 |
| 19                                   | 0.074 | 0     | 0.004 | 0.038 | 0.006 | 0.244 | 0.002 | 0     | 0  | 0.371 |
| 20                                   | 0.111 | 0     | 0.004 | 0.033 | 0.006 | 0.233 | 0.002 | 0.003 | 0  | 0.395 |
| 21                                   | 0.111 | 0     | 0.004 | 0.033 | 0.004 | 0.122 | 0     | 0.003 | 0  | 0.279 |
| 22                                   | 0.074 | 0     | 0.002 | 0.038 | 0.002 | 0.255 | 0     | 0     | 0  | 0.373 |
| <b>EL-Zarka District Network</b>     |       |       |       |       |       |       |       |       |    |       |
| 23                                   | 0.111 | 0     | 0.002 | 0.038 | 0.002 | 0.111 | 0.002 | 0     | 0  | 0.269 |
| 24                                   | 0.111 |       |       |       |       |       |       |       |    | 0.111 |
| 25                                   | 1.11  | 0     | 0.004 | 0.333 | 0.044 | 0.111 | 0     | 0     | 0  | 1.60  |
| 26                                   | 1.11  | 0     | 0.004 | 0.388 | 0.007 | 0.111 | 0.002 | 0     | 0  | 1.62  |
| 27                                   | 1.11  | 0     | 0.002 | 0.038 | 0.004 | 0.111 | 0.002 | 0     | 0  | 1.27  |
| 28                                   | 0.037 | 0     | 0.002 | 0.027 | 0     | 0     | 0     | 0     | 0  | 0.067 |
| 29                                   | 0.111 | 0     | 0.002 | 0.033 | 0.022 | 0     | 0     | 0     | 0  | 0.169 |
| <b>Kafr-Sad District Network</b>     |       |       |       |       |       |       |       |       |    |       |
| 30                                   | 0.37  | 0     | 0.002 | 0.444 | 0.133 | 0.222 | 0     | 0     | 0  | 1.17  |
| 31                                   | 0.74  | 0     | 0.002 | 0.222 | 0.155 | 0.222 | 0.002 | 0     | 0  | 1.34  |
| 32                                   | 0.037 | 0     | 0.004 | 0.388 | 0.013 | 0.033 | 0.005 | 0.007 | 0  | 0.490 |
| 33                                   | 0.074 | 0     | 0.004 | 0.044 | 0.004 | 0.022 | 0.002 | 0     | 0  | 0.152 |
| 34                                   | 0.111 | 0     | 0.006 | 0.05  | 0.002 | 0.022 | 0     | 0     | 0  | 0.193 |
| 35                                   | 0.037 | 0     | 0.004 | 0.038 | 0.004 | 0.011 | 0.002 | 0.007 | 0  | 0.107 |

|    |       |   |       |       |       |       |       |       |   |       |
|----|-------|---|-------|-------|-------|-------|-------|-------|---|-------|
| 36 | 0.037 | 0 | 0.002 | 0.044 | 0.002 | 0.022 | 0.002 | 0.007 | 0 | 0.118 |
| 37 | 0.111 | 0 | 0.004 | 0.033 | 0.004 | 0.011 | 0     | 0     | 0 | 0.165 |

147

148

149 **REFERENCES:**

150

151 Abdel Wahaab, R. and Badawy, M. I. (2004) : Water quality assessment of the River Nile  
152 system: an overview. *Biomedical and Environmental Sciences* 17, 87-100.

153

154 Caerio, S., Costa, M. H., Ramos, T. B., Fernandes, F., Silveira, N., Coimbra, A.,  
155 ...Painho, M. (2005). Assessing heavy metal contamination in Sado Estuary sediment:  
156 An index analysis approach. *Ecological Indicators*, 5, 155-169.

157

158 Chon HT, Ahn JS, Jung MC (1991) Environmental contamination of toxic heavy metals  
159 in the vicinity of some Au–Ag mines in Korea, Proc. of the 4th. Biennial SGA  
160 Meeting. Truku, Finland, p 891

161

162 Egyptian Ministry of Health (EMH) (2007) Standards and specifications of water quality  
163 for drinking and domestic uses. Internal Report. pp 1–8

164

165 Emoyan O.O, Ogban FE, Akarah E (2005) Evaluation of Heavy metals loading of River  
166 Ijana. *Nigeria J ApplSci Environ Manag* 10(2):121–127

167

168 Gazso LG (2001) The key microbial processes in the removal of toxic metals and  
169 radionuclide from the environment. *CEJOEM* 7:178– 185

170

171 Johri N, Jacquillet G, Unwin R (2010) Heavy metal poisoning the effects of cadmium on  
172 the kidney. *Biometals* 23:783–792

173

174 Kim KW, Lee HK, Yoo BC (1998) The environmental impact of gold mines in the Yugu-  
175 Kwangcheon Au-Ag metallogenic province Republic of Korea. *Environ Sci Technol*  
176 19:291–298

177

178 Lee JS, Chon HT, Kim JS, Kim KW, Moon HS (1998) Enrichment of potentially toxic  
179 elements in areas underlain by black shales and slates in Korea. *Environ GeochemHlth*  
180 20(30):135–147

181

182 Nweke OC, Sanders Iii WH. Modern environmental health hazards: a public health issue  
183 of increasing significance in Africa. *Environ Health Perspect* 2009;117:863-70.

184

185 Odukoya AM, Abimbola AF (2010) Contamination assessment of surface and  
186 groundwater within and around two dumpsites. *Int J Environ Sci Tech* 7(2):367–376

187

188 Patrick L. Toxic metals and antioxidants: Part II. The role of antioxidants in arsenic and  
189 cadmium toxic- ity. *Alternate Med Rev* 2003;8:106-28.

190

191 Pink, Daniel H (2006) Investing in Tomorrow's Liquid Gold. Yahoo.  
192 <http://finance.yahoo.com/columnist/article/trenddesk/3748>  
193  
194 Salem HM, Eweida AE, Farag A. Heavy metals in drinking water and the environmental  
195 impact on human health. Egypt: ICEHM 2000, Cairo Univer- sity, 2000:542-56.  
196  
197 Sanchez, E.; Colmenarejo, M. F.; Vi- cente, J.; Rubio, A.; Garcia, M. G.; Travie- so, L.  
198 and Borja, R. (2007) : Use of the water quality index and dissolved oxygen deficit as  
199 simple indicators of watersheds pollution. Ec- ological Indicators 7, 315-328.  
200  
201 Wang M, Xu Y, Pan S, et al. Long-term heavy metal pollution and mortality in a Chinese  
202 population: an ecologic study. Biological Trace Element Research 2010:1-18.  
203  
204 West L (2006) World water day: a billion people worldwide lack safe drinking water.  
205 About  
206  
207 WHO (2011) Guidelines for drinking-water quality, 4 edn. World Health Organization,  
208 Geneva  
209  
210  
211  
212  
213  
214  
215  
216  
217  
218  
219
